# Supplementary material
Source: publisher figshare collection journal article supplement (https://adisjournals.figshare.com/ndownloader/files/17499146)
Supplement: Supplementary file 1 [file 17499146]

# Pegaspargase: A review in acute lymphoblastic leukaemia

Young-A. Heo, Yahiya Y. Syed, Susan J. Keam

*Slide deck*

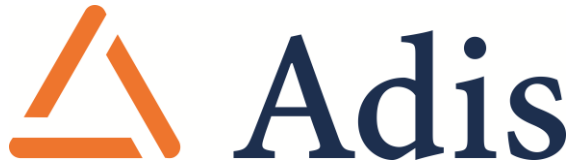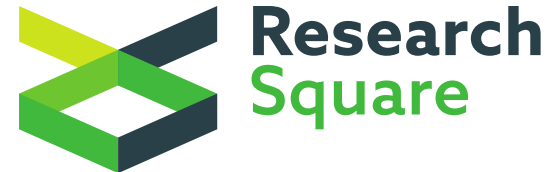

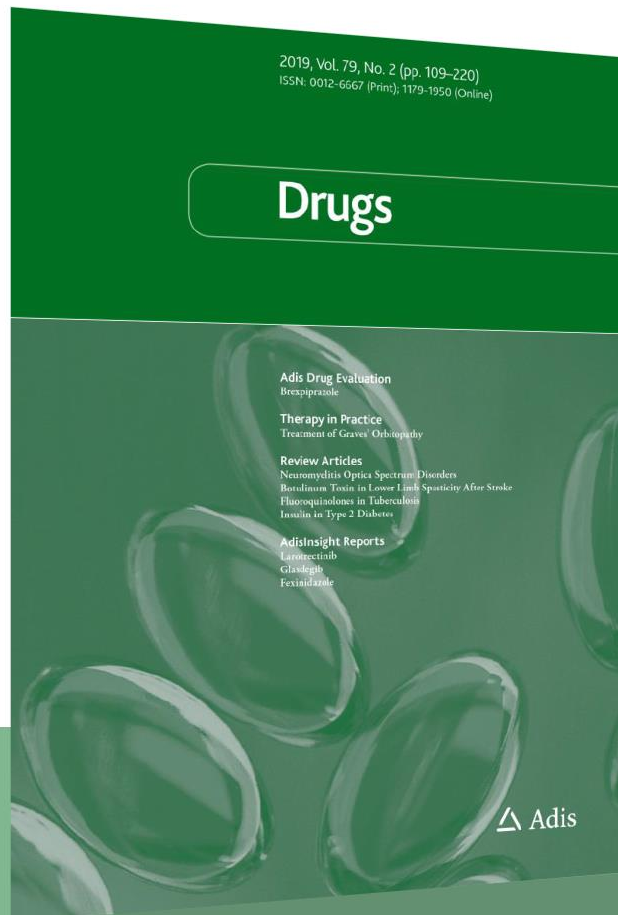

2019, Vol. 79, No. 2 (pp. 109–220)  
ISSN: 0012-6667 (Print); 1179-1950 (Online)

## Drugs

**Adis Drug Evaluation**  
Brexpiprazole

**Therapy in Practice**  
Treatment of Graves' Ophthalmopathy

**Review Articles**  
Neuromyelitis Optica Spectrum Disorders  
Botulinum Toxin in Lower Limb Spasticity After Stroke  
Fluoroquinolones in Tuberculosis  
Insulin in Type 2 Diabetes

**AdisInsight Reports**  
Larotrectinib  
Glasdegib  
Fexinidazole

△ Adis

# Adis Drug Evaluation

## Pegaspargase:

A Review in Acute Lymphoblastic Leukaemia

*Young-A Heo, Yahiya Y. Syed, Susan J. Keam*

*Conflicts of Interest: Young-A Heo, Yahiya Syed, and Susan Keam are salaried employees of Adis/Springer, are responsible for the article content, and declare no relevant conflicts of interest*

*Funding: The preparation of this review was not supported by any external funding*

**Drugs, (2019)79(7): 767-777**

**<https://doi.org/10.1007/s40265-019-01120-1>**

© Springer Nature Switzerland AG 2019

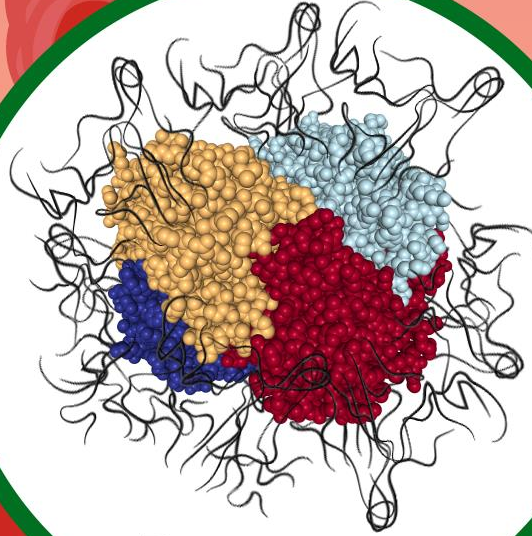

**Pegaspargase**

**Normal blood**

**Acute lymphoblastic  
leukaemia (ALL) blood**

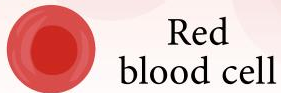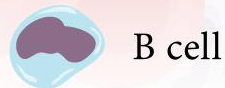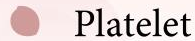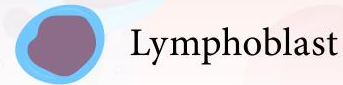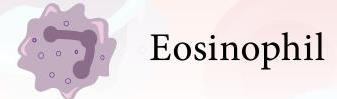

# L-asparaginase

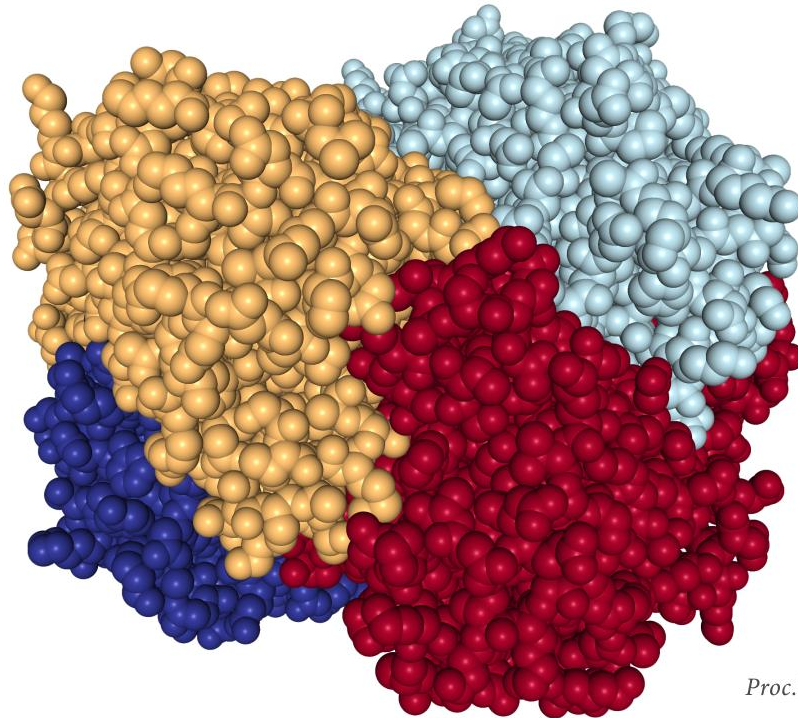

PDB ID 3ECA  
Swain, A.L., et al.(1993)  
*Proc.Natl.Acad.Sci.USA* 90: 1474-1478



# Pegaspargase

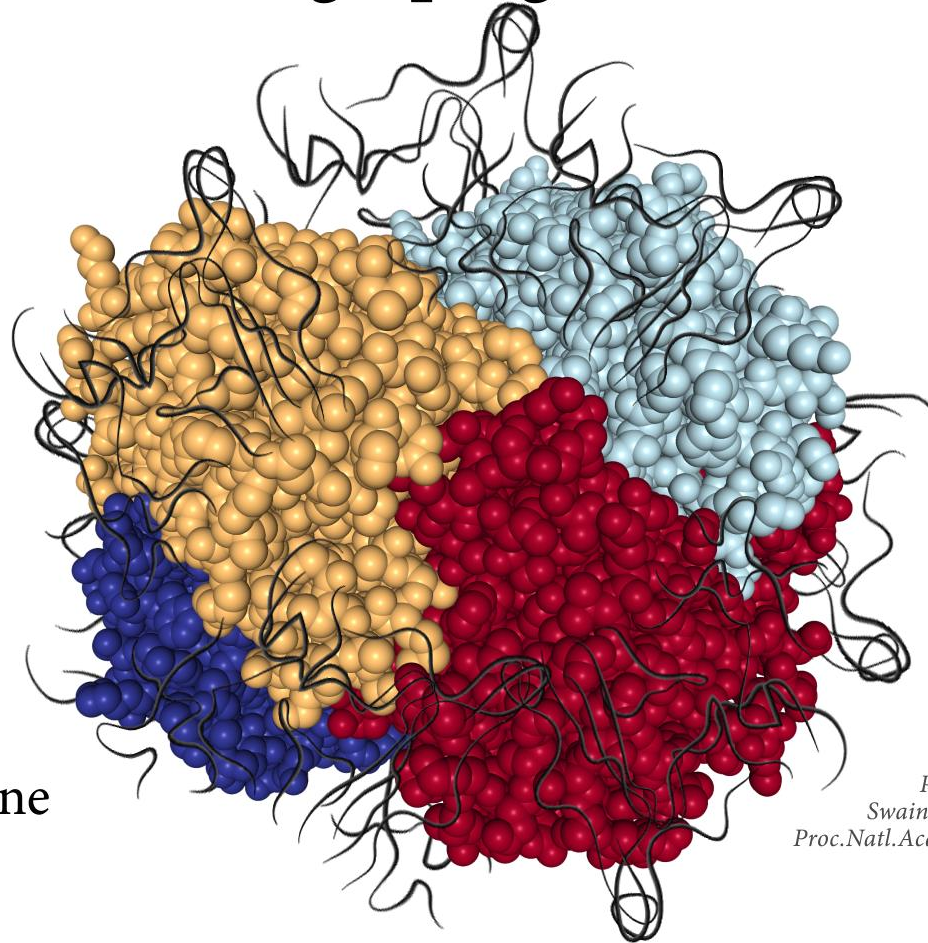

Polyethylene  
glycol

PDB ID 3ECA  
Swain, A.L., et al.(1993)  
*Proc.Natl.Acad.Sci.USA* 90: 1474-1478

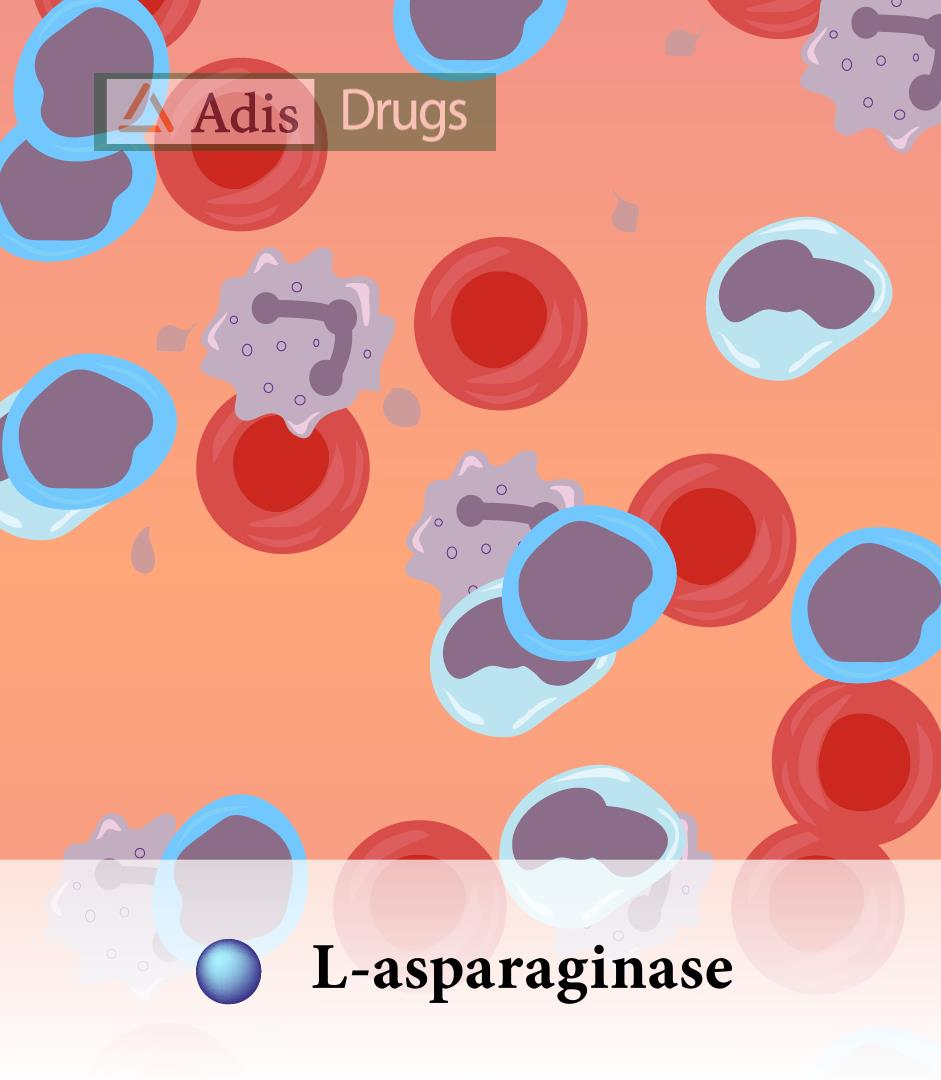

 **L-asparaginase**

Prolonged circulation  
time

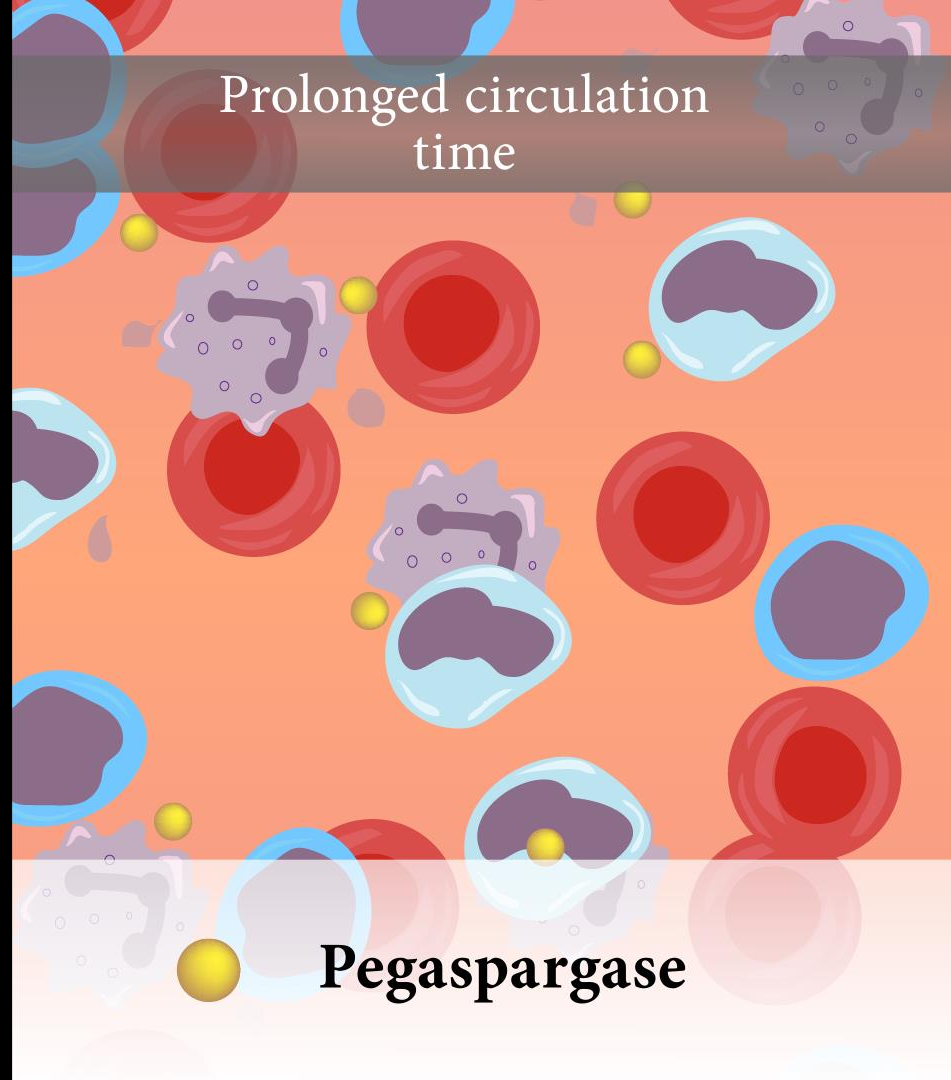

 **Pegaspargase**

Diminished  
immunogenicity

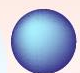

**L-asparaginase**

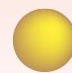

**Pegaspargase**

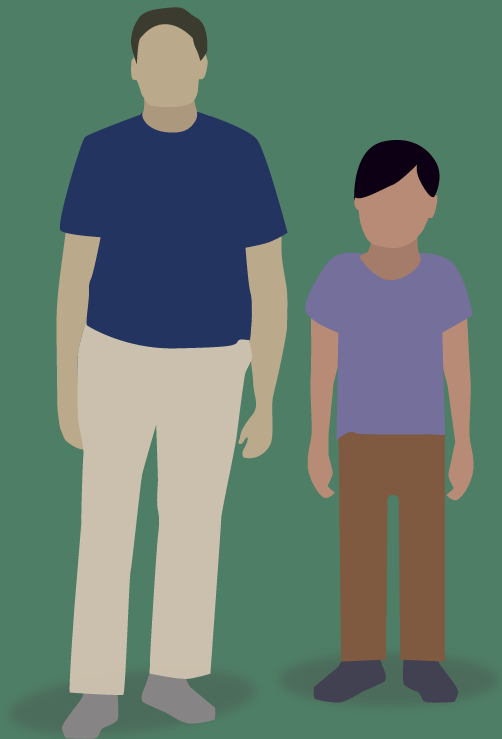

*van der Sluis et al. Consensus expert recommendations for identification and management of asparaginase hypersensitivity and silent inactivation. Haematologica. (2016)101: 279-85.*

# Asparaginase hypersensitivity

---

## Clinical hypersensitivity

- ♦ Allergy symptoms / anaphylaxis
- ♦ Neutralizing antibodies detected
- ♦ Asparaginase inactivation, ↓ activity

## Subclinical hypersensitivity (silent inactivation)

- ♦ Allergy symptoms absent
- ♦ Neutralizing antibodies detected
- ♦ Asparaginase inactivation, ↓ activity



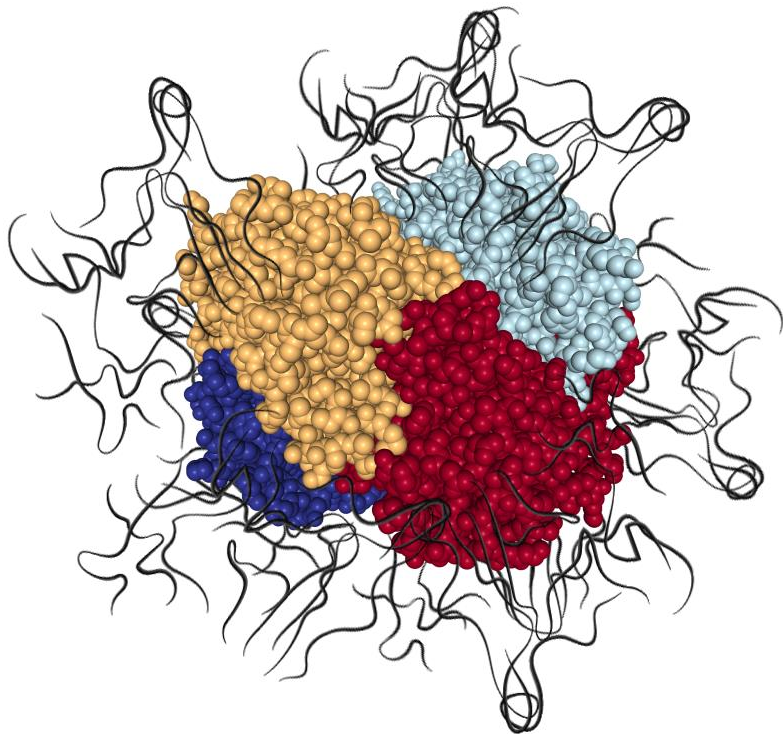

**Pegaspargase**

## **Tolerability**

Manageable profile in paediatric and adult patients with newly diagnosed ALL

Similar profile in patients with relapsed ALL and hypersensitivity to the native enzyme

## **Most common adverse events**

Elevated transaminases and/or bilirubin

Prolonged activated partial thromboplastin time

Hypertriglyceridaemia

Hyperglycaemia

Febrile neutropenia

Pancreatitis

Hypersensitivity reactions

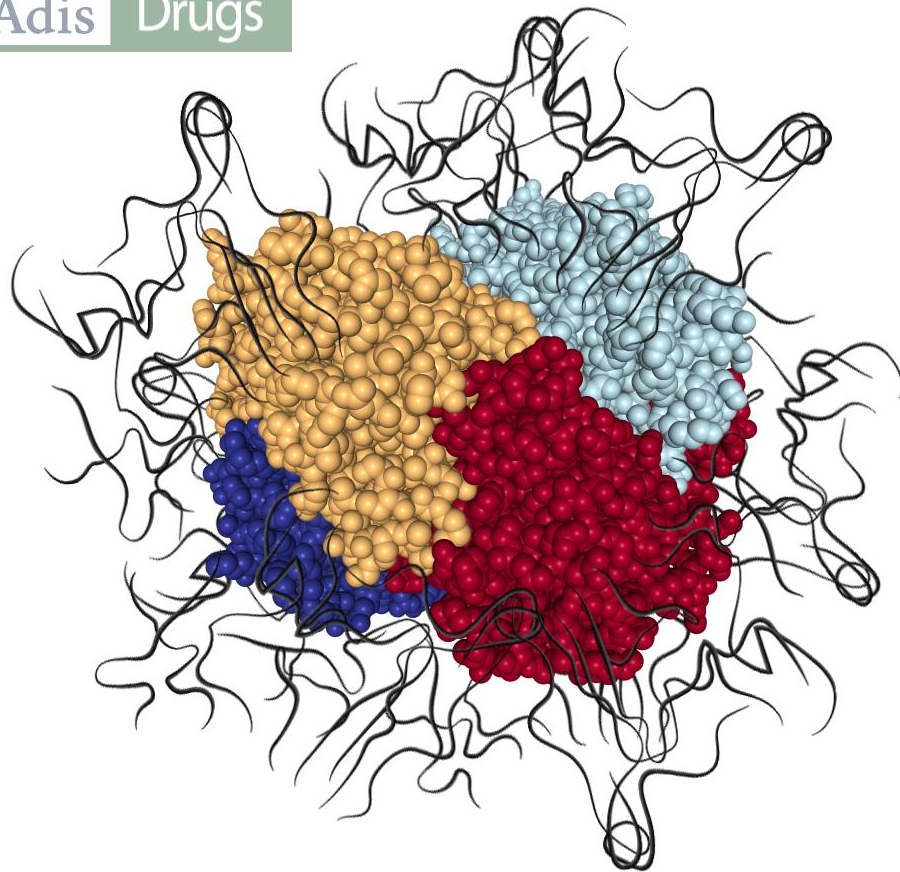

Manageable  
tolerability profile

Convenient dosage  
regimen

Effective treatment  
in children and adults  
with ALL
